# Supplementary material for: A novel biomarker associated with EBV infection improves response prediction of immunotherapy in gastric cancer
Source: Springer Nature journal article supplement (doi:10.1186/s12967-024-04859-8), 2024-01-22

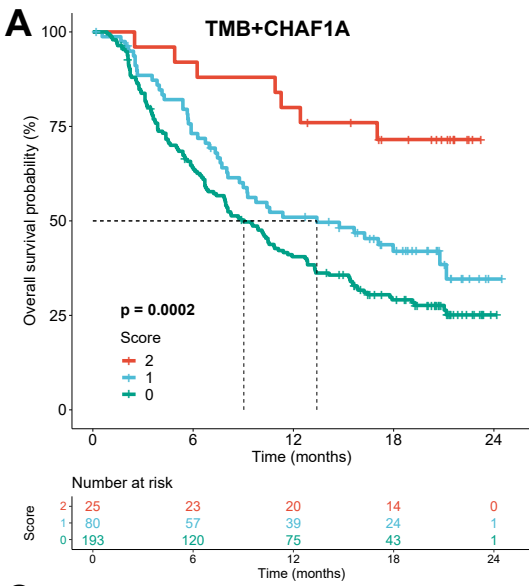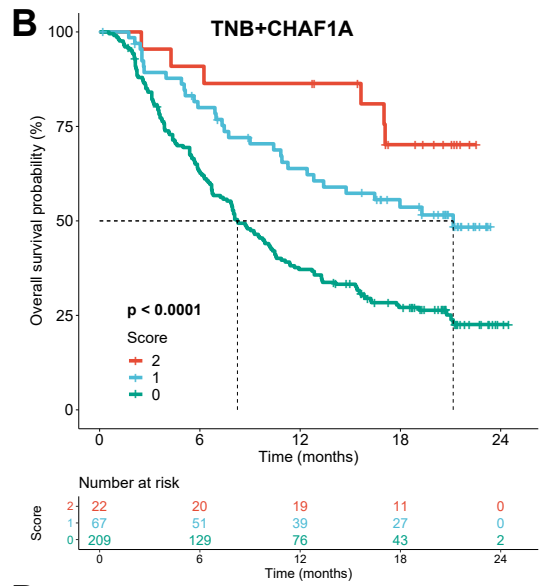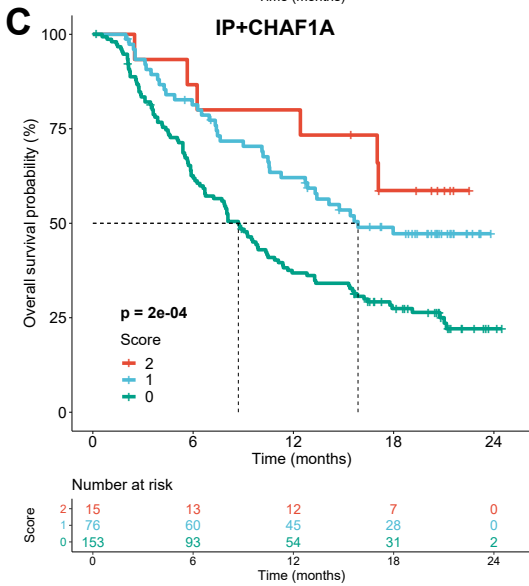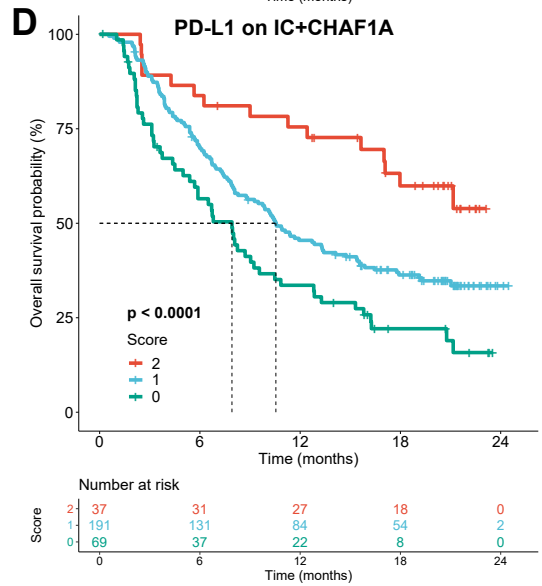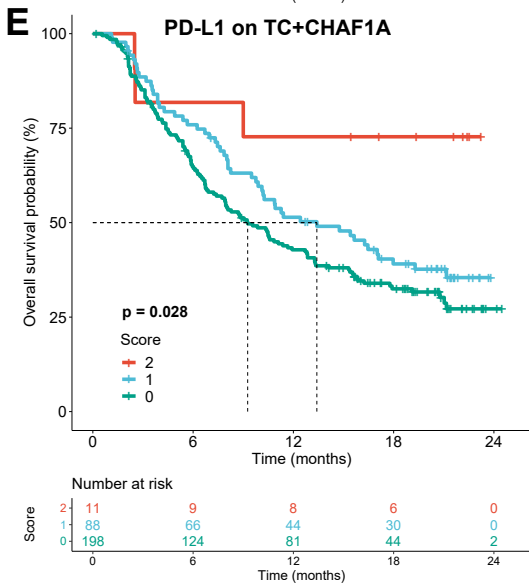

Supplement: MOESM2 [file 26650248]
